# Supplementary material
Source: Springer Nature journal article supplement (https://publikationen.ub.uni-frankfurt.de/files/7207/12943_2009_465_MOESM13_ESM.PDF)
Supplement: MOESM13 [file 12943_2009_465_MOESM13_ESM.PDF]

**Additional file 13.** The top four PANTHER signalling pathways (taken from [www.pantherdb.org](http://www.pantherdb.org)) most strongly differentially regulated between N-myc amplified neuroblastoma tissues from patients with favourable outcome (event-free survival) or poor outcome (death or relapse of disease). Neuroblastoma gene expression data was obtained from ArrayExpress ([www.ebi.ac.uk/arrayexpress](http://www.ebi.ac.uk/arrayexpress); accession E-TABM-38; see Oberthuer et al., J Clin Oncol 2006;24:5070-8).

| <b>PANTHER signalling pathway</b>                                     | <b>p-value</b>                 |
|-----------------------------------------------------------------------|--------------------------------|
| <b>1. Angiogenesis</b>                                                | <b>2.71 x 10<sup>-14</sup></b> |
| 2. Inflammation mediated by chemokine and cytokine signalling pathway | 3.03 x 10 <sup>-12</sup>       |
| 3. PDGF signalling pathway                                            | 2.87 x 10 <sup>-9</sup>        |
| 4. Ras pathway                                                        | 1.30 x 10 <sup>-8</sup>        |
